# Supplementary material
Source: PubMed Central journal article supplement (PMC8410631)
Supplement: NIHMS1688377-supplement-Supplementary_File.pdf [file NIHMS1688377-supplement-Supplementary_File.pdf]

### Supplementary Figure 1

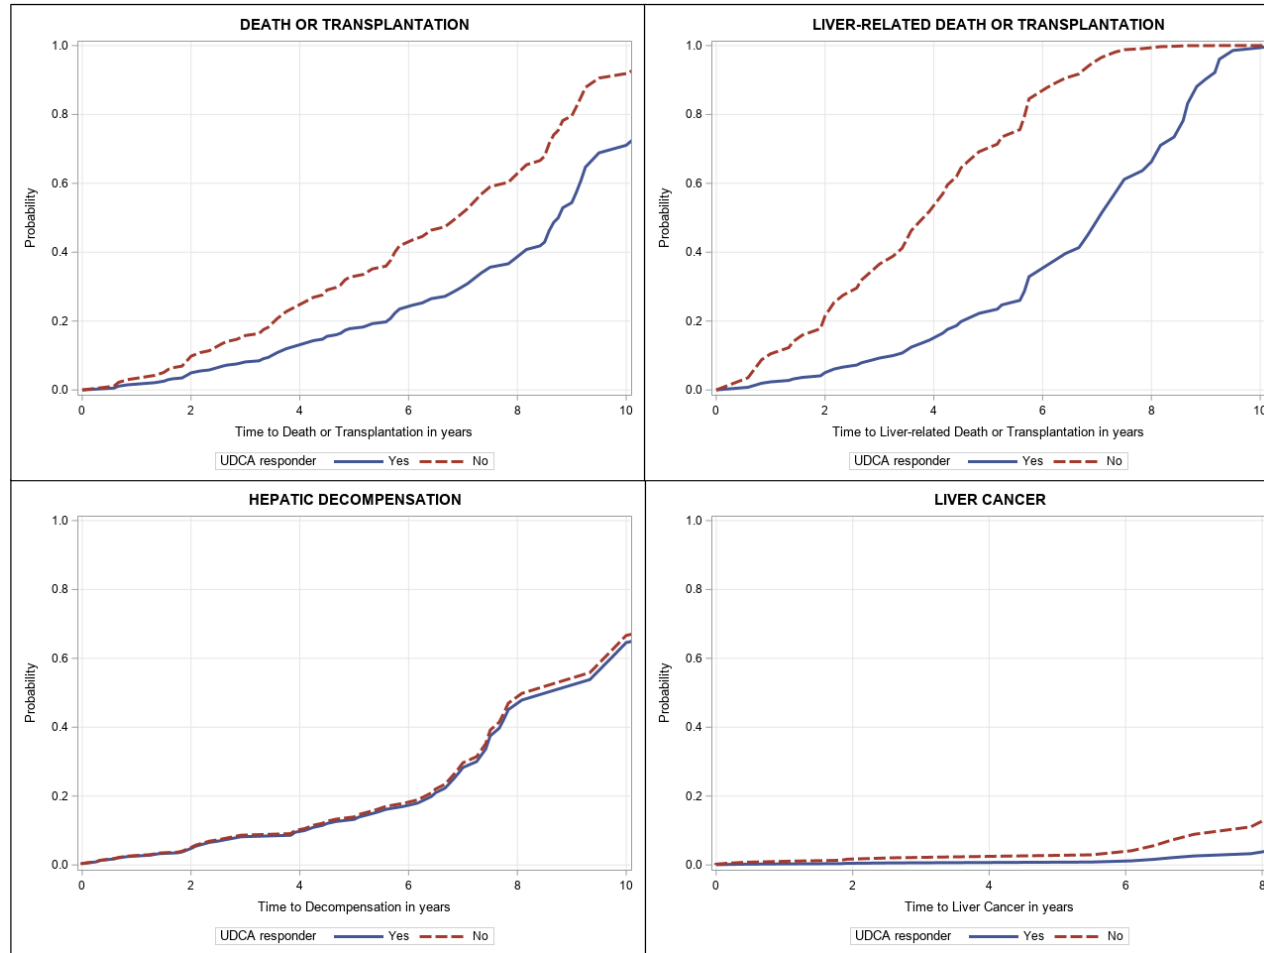

**Sensitivity analysis - Adjusted time from diagnosis of cirrhosis to death or transplantation, liver-related death or transplantation, hepatic decompensation, and liver cancer for patients with portal hypertension, by UDCA response**
